# Supplementary material
Source: Springer Nature journal article supplement (https://www.springermedizin.de/resource/supplementary/12967_2007_220_MOESM1_ESM.pdf/9575978)

Interferon-gamma (pg/mL)

2500

800

600

400

200

0

D=0 D=14 D=28 D=42 D=70 M=1 M=2 D=0 D=14 D=28 D=42 D=63 D=0 D=14 D=28 D=37 D=0 D=28 D=42 D=70 M=2 M=3 D=0 M=4 M=5 M=6 M=7 M=8 M=9 D=0 D=14 D=28 D=42 D=0 D=14 D=28 D=42 D=0 D=14 D=28 D=42 D=70 M=2

1

2

3

6

7

8

10

11

Patients

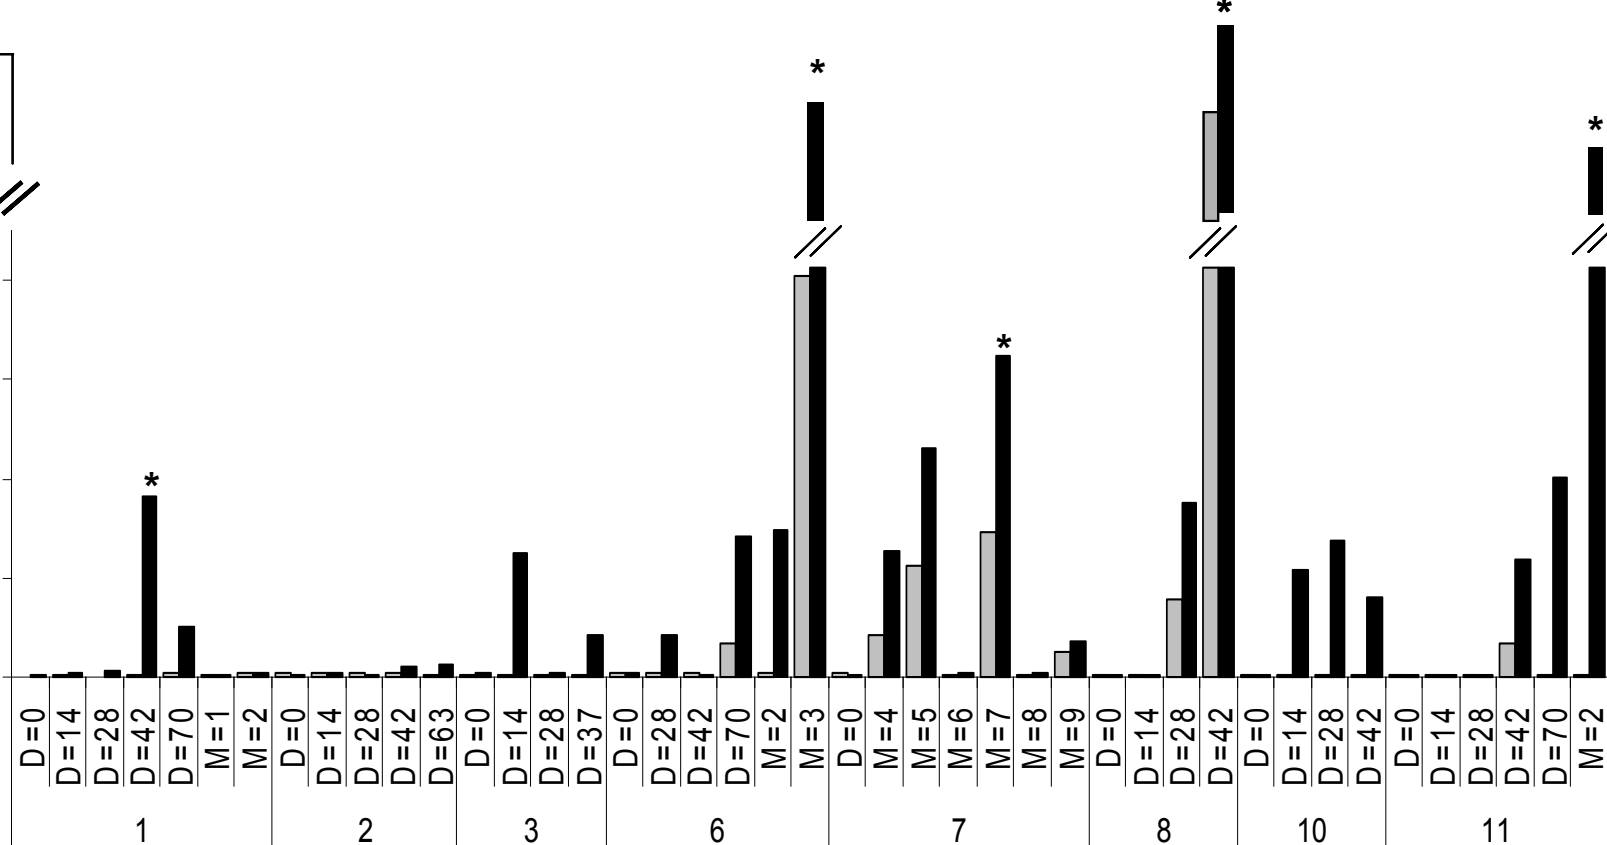

Supplement: MOESM1 [file 9575978]
